# Supplementary material for: Activin Signaling Targeted by Insulin/dFOXO Regulates Aging and Muscle Proteostasis in Drosophila
Source: PLOS journal article supplement (doi:10.1371/journal.pgen.1003941), 2013-11-07
Supplement: S14 (10.1371/journal.pgen.1003941.s014) [file journal.pgen.1003941.s014]

Table S6. Cox proportional hazard survival analysis for the effects of muscle-specific knockdown of *dawdle* and *Atg8a* on lifespan.  $\beta_i$  is the estimate of model parameter and CL is confidence limit (significant when the interval does not bound zero). The hazard ratio is  $\exp(\beta_i)$  and indicates similar mortality to wildtype when 1.0, lower mortality when less than 1 and higher mortality when greater than 1. *Daw* RNAi reduces mortality about 35%, *Atg8a* RNAi has no significant effect on mortality, the double RNAi genotype has 34% elevated mortality and thereby reverses the benefit of *Daw* RNAi.

| Model effect         | $\beta_i$ | Std Error | Lower CL | Upper CL | Hazard ratio |
|----------------------|-----------|-----------|----------|----------|--------------|
| Daw RNAi             | -0.438    | 0.0494    | -0.5363  | -0.3426  | 0.645        |
| Atg8a RNAi           | 0.089     | 0.0461    | -0.0022  | 0.1784   | 1.093        |
| Daw RNAi; Atg8a RNAi | 0.294     | 0.0467    | 0.2014   | 0.3846   | 1.342        |
